# Supplementary material
Source: publisher site journal article supplement (https://www.dovepress.com/article/289018)

Supplementary material **Figure 1** Ultrasound combined with nerve stimulator for lumbar plexus block


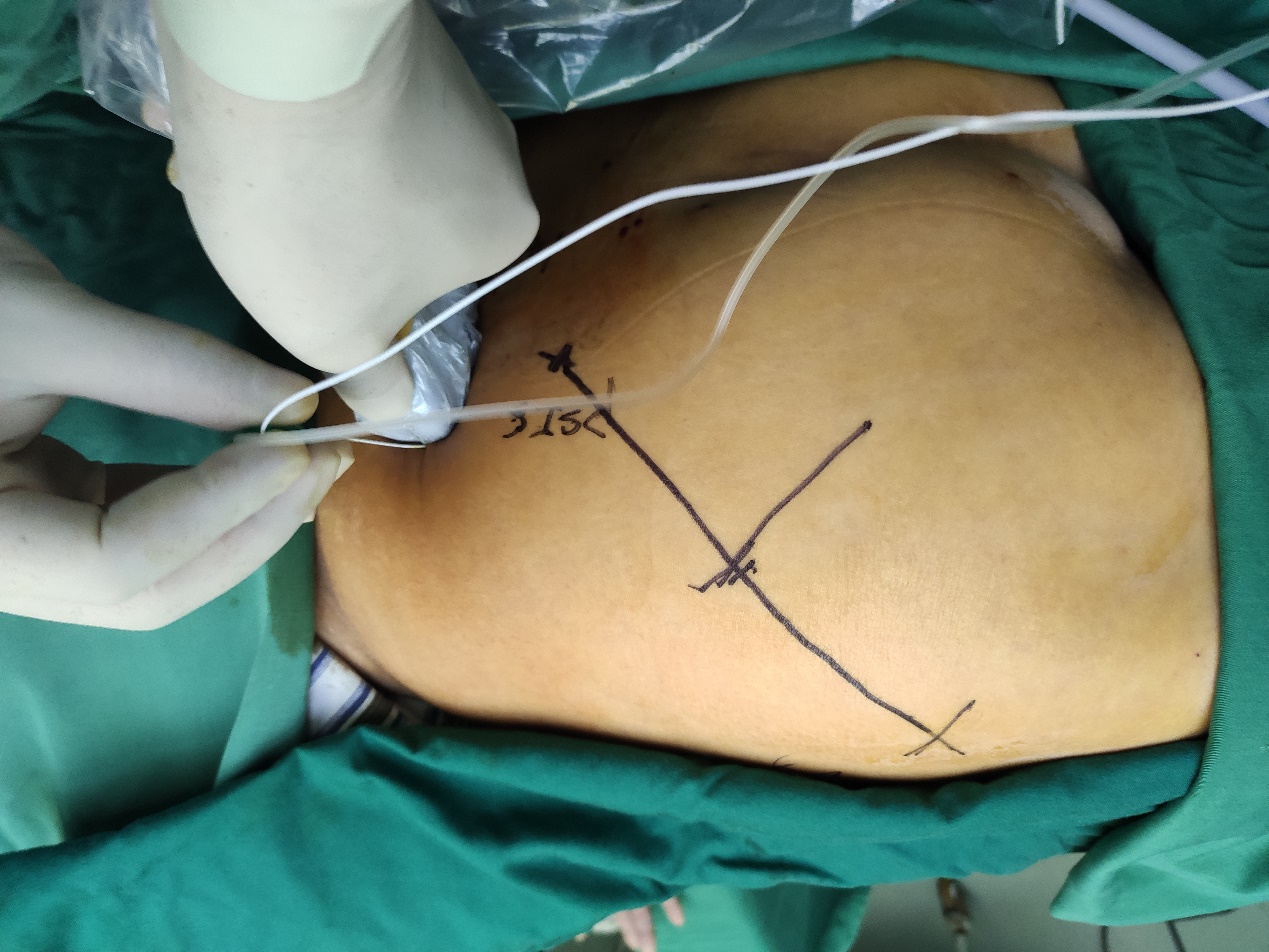


Supplementary material **Figure 2** Ultrasound combined with nerve stimulator for sacral plexus block


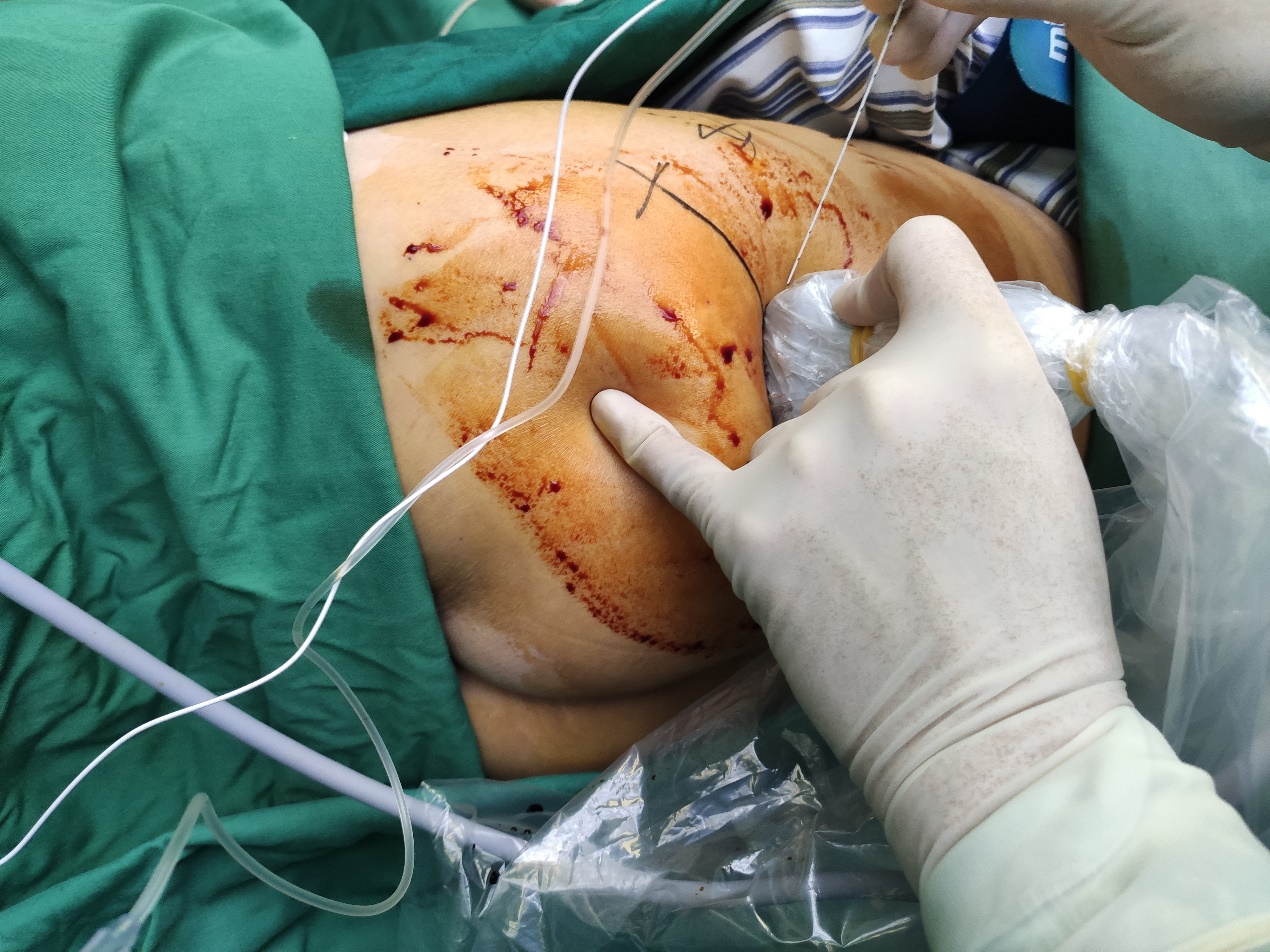

Supplement: Supplementary file 1 [file get_supplementary_file.php]
